# Supplementary material for: Rapid affinity optimization of an anti-TREM2 clinical lead antibody by cross-lineage immune repertoire mining
Source: PubMed Central journal article supplement — Nat Commun. 2024 Sep 27;15:8382. doi: 10.1038/s41467-024-52442-y (PMC11437124; doi:10.1038/s41467-024-52442-y), 2024-09-27
Supplement: 41467_2024_52442_MOESM3_ESM.pdf [file 41467_2024_52442_MOESM3_ESM.pdf]

## Description of Additional Supplementary Files

**Supplementary Data 1** – Sequences of anti-TREM2 antibody clones. The amino acid and nucleotide sequence for the variable regions, amino acid sequence for CDR H3 and L3, where applicable, CDR H3 length, TREM2 binding, clonal or parallel lineage group and source for each sequence are indicated for each of the described clones.

**Supplementary Data 2** – Sequences of oligonucleotide primers used to generate repertoire V<sub>H</sub> amplicons for sequencing. The nucleotide sequences and the relative prevalence of each V<sub>H</sub>-specific primer in the amplification mix are listed.
