# Supplementary material for: Rapid affinity optimization of an anti-TREM2 clinical lead antibody by cross-lineage immune repertoire mining
Source: PubMed Central journal article supplement — Nat Commun. 2024 Sep 27;15:8382. doi: 10.1038/s41467-024-52442-y (PMC11437124; doi:10.1038/s41467-024-52442-y), 2024-09-27
Supplement: 41467_2024_52442_MOESM5_ESM.pdf [file 41467_2024_52442_MOESM5_ESM.pdf]

## Reporting Summary

Nature Portfolio wishes to improve the reproducibility of the work that we publish. This form provides structure for consistency and transparency in reporting. For further information on Nature Portfolio policies, see our [Editorial Policies](#) and the [Editorial Policy Checklist](#).

### Statistics

For all statistical analyses, confirm that the following items are present in the figure legend, table legend, main text, or Methods section.

n/a Confirmed

- The exact sample size ( $n$ ) for each experimental group/condition, given as a discrete number and unit of measurement
- A statement on whether measurements were taken from distinct samples or whether the same sample was measured repeatedly
- The statistical test(s) used AND whether they are one- or two-sided  
*Only common tests should be described solely by name; describe more complex techniques in the Methods section.*
- A description of all covariates tested
- A description of any assumptions or corrections, such as tests of normality and adjustment for multiple comparisons
- A full description of the statistical parameters including central tendency (e.g. means) or other basic estimates (e.g. regression coefficient) AND variation (e.g. standard deviation) or associated estimates of uncertainty (e.g. confidence intervals)
- For null hypothesis testing, the test statistic (e.g.  $F$ ,  $t$ ,  $r$ ) with confidence intervals, effect sizes, degrees of freedom and  $P$  value noted  
*Give  $P$  values as exact values whenever suitable.*
- For Bayesian analysis, information on the choice of priors and Markov chain Monte Carlo settings
- For hierarchical and complex designs, identification of the appropriate level for tests and full reporting of outcomes
- Estimates of effect sizes (e.g. Cohen's  $d$ , Pearson's  $r$ ), indicating how they were calculated

*Our web collection on [statistics for biologists](#) contains articles on many of the points above.*

### Software and code

Policy information about [availability of computer code](#)

Data collection

No software used

Data analysis

Raw NGS sequencing data analyzed with Absolve, available from <https://github.com/Genentech/Absolve>. X-ray diffraction data was processed with XDS/Aimless, and phases were obtained using Phaser for molecular replacement. Model building and refinement was conducted using Coot and Phenix, respectively. Molecular dynamics (MD) simulations were carried out using Amber19 (<https://ambermd.org/>), with structure preparation using PyMOL v2.5.4, PROPKA v3.0, PDB2PQR (v2.1.1), and tleap (part of Amber). For MD analyses, built-in algorithms were used for alignment, RMSD measurements, and rendering within Visual Molecular Dynamics (VMD) v1.9.3, a freely available MD visualization software (<https://www.ks.uiuc.edu/Research/vmd/>). The PyRosetta (version 2022.41+release.28dc2a1) software package was used for energetic analyses, which employed standard built-in algorithms such as FastRelax, InteractionEnergyMetric, and MutateResidue. The flags used to control the behavior of FastRelax in the initial structure preparation step are already provided in the Methods. PyRosetta is available on the internet via both academic and commercial licenses (<https://www.pyrosetta.org/>, <https://github.com/RosettaCommons/rosetta>).

For manuscripts utilizing custom algorithms or software that are central to the research but not yet described in published literature, software must be made available to editors and reviewers. We strongly encourage code deposition in a community repository (e.g. GitHub). See the Nature Portfolio [guidelines for submitting code & software](#) for further information.

## Data

Policy information about [availability of data](#)

All manuscripts must include a [data availability statement](#). This statement should provide the following information, where applicable:

- Accession codes, unique identifiers, or web links for publicly available datasets
- A description of any restrictions on data availability
- For clinical datasets or third party data, please ensure that the statement adheres to our [policy](#)

Variable region sequences of all antibodies tested are provided in Supplementary File 1. Atomic coordinates for the structures of the hu3.10C2 and huPara.09 Fab fragments in complex with TREM2 have been deposited in the Protein Data Bank with accession numbers 8T51 and 8T59

## Research involving human participants, their data, or biological material

Policy information about studies with [human participants or human data](#). See also policy information about [sex, gender \(identity/presentation\), and sexual orientation](#) and [race, ethnicity and racism](#).

|                                                                    |                |
|--------------------------------------------------------------------|----------------|
| Reporting on sex and gender                                        | Not applicable |
| Reporting on race, ethnicity, or other socially relevant groupings | Not applicable |
| Population characteristics                                         | Not applicable |
| Recruitment                                                        | Not applicable |
| Ethics oversight                                                   | Not applicable |

Note that full information on the approval of the study protocol must also be provided in the manuscript.

## Field-specific reporting

Please select the one below that is the best fit for your research. If you are not sure, read the appropriate sections before making your selection.

- Life sciences       Behavioural & social sciences       Ecological, evolutionary & environmental sciences

For a reference copy of the document with all sections, see [nature.com/documents/nr-reporting-summary-flat.pdf](https://www.nature.com/documents/nr-reporting-summary-flat.pdf)

## Life sciences study design

All studies must disclose on these points even when the disclosure is negative.

|                 |                                                                                                                                                                                                                                                                                                                                                                                                     |
|-----------------|-----------------------------------------------------------------------------------------------------------------------------------------------------------------------------------------------------------------------------------------------------------------------------------------------------------------------------------------------------------------------------------------------------|
| Sample size     | 1 sample for antigen-positive dataset, 3 samples for repertoire datasets                                                                                                                                                                                                                                                                                                                            |
| Data exclusions | No data were excluded from the analyses                                                                                                                                                                                                                                                                                                                                                             |
| Replication     | Biacore SPR experiments for 3.10C2 and Para.09 antibodies performed 4 independent times. Jurkat-NFAT reporter assays performed in triplicate. Soluble TREM2 binding performed 2 to 4 independent times. Soluble TREM2 binding performed in triplicate. Molecular simulations ran three times for each antibody/antigen pair and free antigen. SPR binding for 3.10C2 CDR H3 mutants performed once. |
| Randomization   | Not applicable                                                                                                                                                                                                                                                                                                                                                                                      |
| Blinding        | Not applicable                                                                                                                                                                                                                                                                                                                                                                                      |

## Reporting for specific materials, systems and methods

We require information from authors about some types of materials, experimental systems and methods used in many studies. Here, indicate whether each material, system or method listed is relevant to your study. If you are not sure if a list item applies to your research, read the appropriate section before selecting a response.

## Materials &amp; experimental systems

|                                     |                                                                 |
|-------------------------------------|-----------------------------------------------------------------|
| n/a                                 | Involvement in the study                                        |
| <input type="checkbox"/>            | <input checked="" type="checkbox"/> Antibodies                  |
| <input type="checkbox"/>            | <input checked="" type="checkbox"/> Eukaryotic cell lines       |
| <input checked="" type="checkbox"/> | <input type="checkbox"/> Palaeontology and archaeology          |
| <input type="checkbox"/>            | <input checked="" type="checkbox"/> Animals and other organisms |
| <input checked="" type="checkbox"/> | <input type="checkbox"/> Clinical data                          |
| <input checked="" type="checkbox"/> | <input type="checkbox"/> Dual use research of concern           |
| <input checked="" type="checkbox"/> | <input type="checkbox"/> Plants                                 |

## Methods

|                                     |                                                 |
|-------------------------------------|-------------------------------------------------|
| n/a                                 | Involvement in the study                        |
| <input checked="" type="checkbox"/> | <input type="checkbox"/> ChIP-seq               |
| <input checked="" type="checkbox"/> | <input type="checkbox"/> Flow cytometry         |
| <input checked="" type="checkbox"/> | <input type="checkbox"/> MRI-based neuroimaging |

## Antibodies

|                 |                                                                                                                                                                                                                                                                                                                                                                                                                                                                                                                                                                                                                                                                                                                                                                                                                                                                                                                                                                 |
|-----------------|-----------------------------------------------------------------------------------------------------------------------------------------------------------------------------------------------------------------------------------------------------------------------------------------------------------------------------------------------------------------------------------------------------------------------------------------------------------------------------------------------------------------------------------------------------------------------------------------------------------------------------------------------------------------------------------------------------------------------------------------------------------------------------------------------------------------------------------------------------------------------------------------------------------------------------------------------------------------|
| Antibodies used | Anti-TREM2 antibodies described generated in study; variable region sequences for all antibodies tested provided in Supplementary File 1. Anti-TREM2 antibodies 1.16B8 and 3.17A9 derived in this study as described in Methods. The following commercially-obtained antibodies were used: anti-rat CD4 (BD Biosciences, clone OX-35, Cat. 554836), anti-rat CD8a (BD Biosciences, clone OX-8, Cat. 554855), anti-rat CD161a (BD Biosciences, clone 10/78, Cat. 550978), anti-rat granulocyte (eBioscience, clone HIS48, Cat. 13-0570-82), anti-rat CD11b/c (Biolegend, clone OX-42, Cat. 201803), anti-rat erythrocyte (ThermoFisher, clone OX-83, Cat. MA5-17580), anti-IgM antibody at 5 µg/ml (BD Biosciences, clone G53-238, Cat. 553886), anti-rat IgG1-fluorescein isothiocyanate (FITC) (Bethyl Laboratories, Cat. A110-106F), anti-rat IgG2a-FITC (Bethyl Laboratories, Cat. A110-109F) and anti-rat IgG2b-FITC (Bethyl Laboratories, Cat. A110-111F). |
| Validation      | Validation of antibodies derived in this study described in results. Validation of commercial antibodies by vendors.                                                                                                                                                                                                                                                                                                                                                                                                                                                                                                                                                                                                                                                                                                                                                                                                                                            |

## Eukaryotic cell lines

Policy information about [cell lines and Sex and Gender in Research](#)

|                                                                   |                                                                                                                   |
|-------------------------------------------------------------------|-------------------------------------------------------------------------------------------------------------------|
| Cell line source(s)                                               | CHO cells, Genentech-maintained sub-line; HEK293, Genentech-maintained sub-line; Expi293, ThermoFisher Scientific |
| Authentication                                                    | CHO and HEK293, no authentication; Expi293, authentication by vendor                                              |
| Mycoplasma contamination                                          | Negative                                                                                                          |
| Commonly misidentified lines (See <a href="#">ICLAC</a> register) | Not applicable                                                                                                    |

## Animals and other research organisms

Policy information about [studies involving animals; ARRIVE guidelines](#) recommended for reporting animal research, and [Sex and Gender in Research](#)

|                         |                                                                                                                                                                                                                                                                                                                                                                                                                                                                                                                                       |
|-------------------------|---------------------------------------------------------------------------------------------------------------------------------------------------------------------------------------------------------------------------------------------------------------------------------------------------------------------------------------------------------------------------------------------------------------------------------------------------------------------------------------------------------------------------------------|
| Laboratory animals      | Sprague Dawley rats                                                                                                                                                                                                                                                                                                                                                                                                                                                                                                                   |
| Wild animals            | None                                                                                                                                                                                                                                                                                                                                                                                                                                                                                                                                  |
| Reporting on sex        | N/A                                                                                                                                                                                                                                                                                                                                                                                                                                                                                                                                   |
| Field-collected samples | N/A                                                                                                                                                                                                                                                                                                                                                                                                                                                                                                                                   |
| Ethics oversight        | All animals used in this study were housed and maintained at Genentech in accordance with American Association of Laboratory Animal Care guidelines. All experimental studies were conducted under protocols approved by the Institutional Animal Care and Use Committee of Genentech Lab Animal Research in an Association for Assessment and Accreditation of Laboratory Animal Care International-accredited facility in accordance with the Guide for the Care and Use of Laboratory Animals and applicable laws and regulations. |

Note that full information on the approval of the study protocol must also be provided in the manuscript.
